# Supplementary material
Source: HighWire-hosted journal article supplement (https://jaha.ahajournals.org/content/6/4/e005790)
Supplement: inline-supplementary-material-1 [file inline-supplementary-material-1.pdf]

# **SUPPLEMENTAL MATERIAL**

## **Data S1**

### **Supplemental Methods**

#### **Human Sample Collection in Patients With Coronary Artery Disease (CAD)**

This study was received prior approval from the Ethics Committees of Showa University and Tokyo University of Pharmacy and Life Sciences. Informed consent was obtained from a total of 98 participants prior to their enrollment. Blood was drawn from 70 patients with acute coronary syndrome (ACS), admitted within 4 hours after onset to Showa University Hospital for emergency coronary catheterization (42 men, 28 women; aged 22–88); 28 healthy volunteers (17 men, 11 women; aged 21–56) were also recruited. ACS patients included 53 with acute myocardial infarction and 17 with unstable angina pectoris. Plasma KP-10 level was measured by enzyme-linked immunosorbent assay (ELISA; Phoenix Pharmaceuticals) after extraction with Sep-Pak C18 cartridge (Waters Associates) as described before.<sup>1</sup>

Buffered 10% formalin-fixed paraffin-embedded human coronary artery specimens from archive collections of the National Cerebral and Cardiovascular Center were used for immunohistochemistry. Serial cross-sections (3–4  $\mu\text{m}$ ) of coronary arteries from 14 patients with CAD (aged 60–87) and 4 patients with dilated cardiomyopathy (as non-CAD examples) (aged 19–39) were stained with polyclonal rabbit antibody against human KP-10 or its receptor GPR54 (LifeSpan BioSciences) as described previously.<sup>2,3</sup>

### **Supplemental Results**

## **Expressions of KP-10 and GPR54 in Coronary Artery Lesions and Plasma in CAD**

### **Patients**

Faint expressions of KP-10 and GPR54 were observed in the endothelium of normal coronary arteries from non-CAD patients (Figure S2A: a, b). KP-10 also was abundantly expressed in adventitia (Figure S2A: a). In stenotic and obstructive coronary arteries from CAD patients, both KP-10 and GPR54 were expressed at high levels in the atheromatous plaques (Figure S2A: c–h). Both KP-10 and GPR54 expressions became greater in accordance with the severity of atheromatous plaques (Figure S2A: c–h). In contrast, plasma KP-10 level tended to be reduced in CAD (ACS) patients compared with healthy volunteers (Figure S2B). We speculate that plasma KP-10 may be rapidly exhausted in thrombus formation in the coronary arteries within 4 hours after onset of ACS, because KP-10 is also known to act as an anti-coagulant and thrombolytic agent.<sup>4</sup>

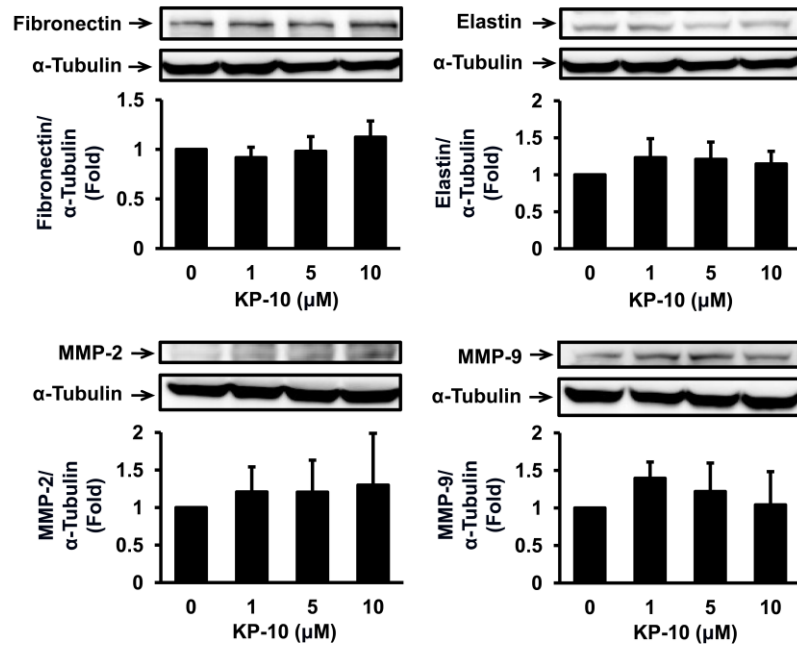

**Figure S1.** Effects of KP-10 on extracellular matrix expression in human aortic smooth muscle cells (HASMCs). HASMCs were incubated with the indicated concentrations of KP-10 for 24 hours and subjected for immunoblot analyses of fibronectin, elastin, metalloproteinase (MMP)-2, and MMP-9. Representative images showing protein expression (upper panels) with densitometry following normalization relative to  $\alpha$ -tubulin (lower panels). Data are shown as means  $\pm$  SEM from 4 independent experiments.

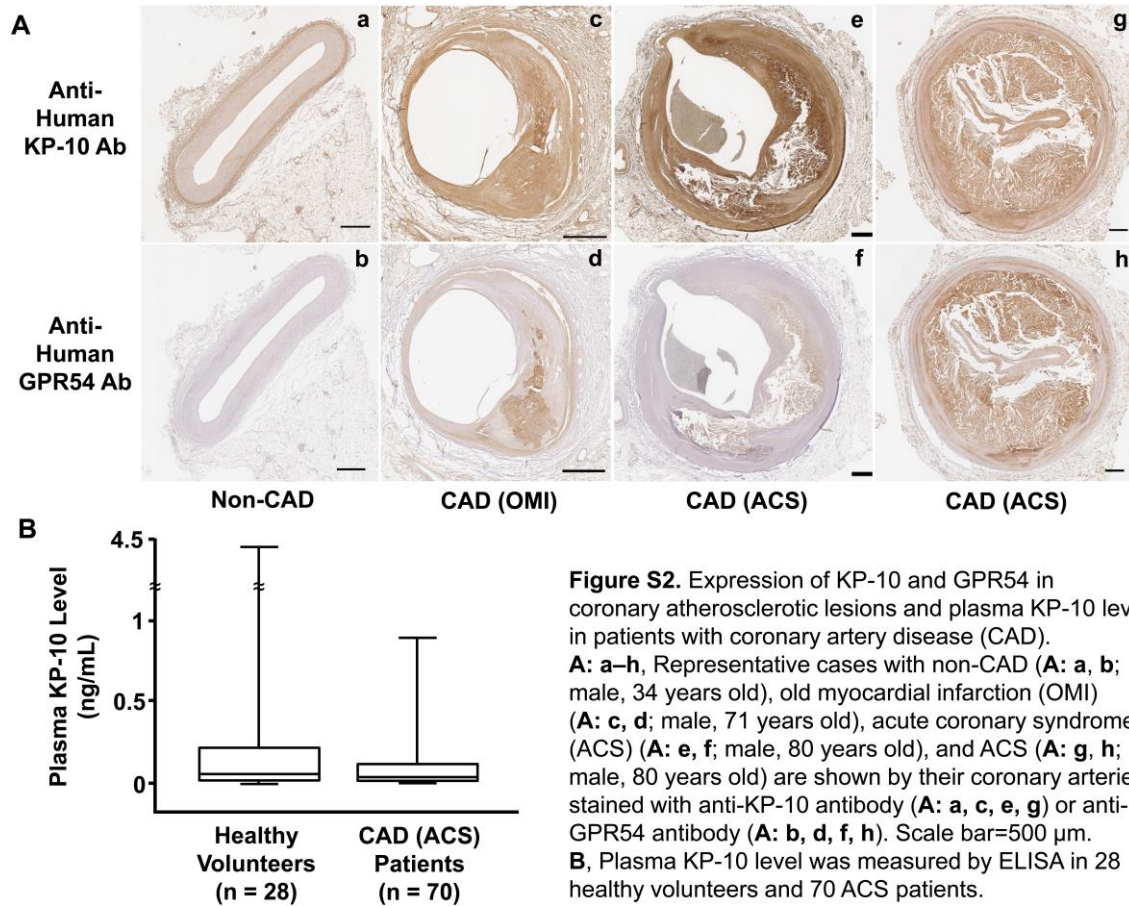

### Supplemental References:

1. Sato K, Koyama T, Tateno T, Hirata Y, Shichiri M. Presence of immunoreactive salusin- $\alpha$  in human serum and urine. *Peptides*. 2006;27:2561–2566.
2. Watanabe K, Watanabe R, Konii H, Shirai R, Sato K, Matsuyama TA, Ishibashi-Ueda H, Koba S, Kobayashi Y, Hirano T, Watanabe T. Counteractive effects of omentin-1 against atherogenesis. *Cardiovasc Res*. 2016;110:118–128.
3. Watanabe R, Watanabe H, Takahashi Y, Kojima M, Konii H, Watanabe K, Shirai R, Sato K, Matsuyama T, Ishibashi-Ueda H, Iso Y, Koba S, Kobayashi Y, Hirano T, Watanabe T. Atheroprotective Effects of Tumor Necrosis Factor-Stimulated Gene-6. *JACC Basic Transl Sci*. 2016;1:496–509.
4. Qureshi IZ, Kanwal S. Novel role of puberty onset protein kisspeptin as an anticoagulation peptide. *Blood Coagul Fibrinolysis*. 2011;22:40–49.
